# Supplementary material for: Associations Between Quality of Life and Functioning in an Assertive Community Treatment Population
Source: Atypon-hosted journal article supplement (doi:10.1176/appi.ps.201400376), 2015-08-03
Supplement: appi.ps.201400376.ds001.pdf [file appi.ps.201400376.ds001.pdf]

Table: Multivariate regression analyses with associations between PSF factors and MANSA domains<sup>1</sup>

| MANSA life domains           | PSF basic skills                              |             |             |                     |             |                 |                             |              |                 |
|------------------------------|-----------------------------------------------|-------------|-------------|---------------------|-------------|-----------------|-----------------------------|--------------|-----------------|
|                              | Personal hygiene                              |             |             | Housekeeping        |             |                 | Managing economy            |              |                 |
|                              | Coefficient                                   | 95% CI      | p-value     | Coefficient         | 95% CI      | p-value         | Coefficient                 | 95% CI       | p-value         |
| <b>Family</b>                | .10                                           | -.02 to .22 | .089        | .08                 | -.04 to .21 | .194            | .06                         | -.06 to .18  | .354            |
| <b>Friends</b>               | .07                                           | -.02 to .17 | .133        | .04                 | -.10 to .11 | .945            | .02                         | -.07 to .11  | .665            |
| <b>Employment/activities</b> | -.01                                          | -.14 to .11 | .826        | .02                 | -.11 to .15 | .714            | -.01                        | -.13 to .12  | .902            |
| <b>Leisure time</b>          | .04                                           | -.08 to .16 | .480        | .07                 | -.05 to .20 | .261            | -.01                        | -.13 to .10  | .841            |
| <b>Financial situation</b>   | .13                                           | .01 to .24  | <b>.036</b> | .12                 | -.01 to .24 | .068            | .20                         | .09 to .31   | <b>&lt;.001</b> |
| <b>Personal safety</b>       | .10                                           | -.10 to .20 | .075        | -.002               | -.12 to .11 | .972            | -.07                        | -.18 to .03  | .179            |
| <b>Physical health</b>       | .20                                           | .08 to .31  | <b>.001</b> | .25                 | .13 to .37  | <b>&lt;.001</b> | .10                         | -.01 to .21  | .066            |
| <b>Mental health</b>         | .12                                           | .006 to .23 | <b>.038</b> | .13                 | .02 to .24  | <b>.024</b>     | -.02                        | -.13 to .09  | .738            |
| <b>Living situation</b>      | .07                                           | -.05 to .18 | .256        | .01                 | -.11 to .13 | .889            | .07                         | -.04 to .18  | .195            |
| <b>Accommodation</b>         | .12                                           | -.02 to .26 | .087        | .15                 | .003 to .29 | <b>.046</b>     | -.01                        | -.15 to .12  | .871            |
| MANSA life domains           | PSF skills for participating in the community |             |             |                     |             |                 | PSF social skills           |              |                 |
|                              | Transportation                                |             |             | Work and activities |             |                 | Contact with social network |              |                 |
|                              | Coefficient                                   | 95% CI      | p-value     | Coefficient         | 95% CI      | p-value         | Coefficient                 | 95% CI       | p-value         |
| <b>Family</b>                | -.07                                          | -.22 to .08 | .328        | .05                 | -.09 to .20 | .472            | .13                         | -.004 to .27 | .058            |
| <b>Friends</b>               | .02                                           | -.11 to .14 | .786        | .05                 | -.06 to .17 | .374            | .22                         | .12 to .32   | <b>&lt;.001</b> |
| <b>Employment/activities</b> | -.09                                          | -.24 to .07 | .264        | -.05                | -.20 to .10 | .179            | .04                         | -.11 to .18  | .605            |
| <b>Leisure time</b>          | .17                                           | .03 to .32  | <b>.022</b> | .12                 | -.02 to .26 | .091            | .12                         | -.02 to .25  | .084            |
| <b>Financial situation</b>   | .02                                           | -.13 to .17 | .733        | .15                 | .01 to .29  | <b>.034</b>     | .10                         | -.03 to .23  | .141            |
| <b>Personal safety</b>       | .06                                           | -.07 to .20 | .349        | .05                 | -.08 to .18 | .408            | .03                         | -.09 to .16  | .598            |
| <b>Physical health</b>       | .09                                           | -.06 to .24 | .215        | .14                 | .002 to .27 | <b>.047</b>     | .12                         | -.01 to .25  | .074            |
| <b>Mental health</b>         | .11                                           | -.03 to .25 | .117        | .16                 | .02 to .29  | <b>.022</b>     | .06                         | -.07 to .19  | .383            |
| <b>Living situation</b>      | .02                                           | -.13 to .16 | .840        | -.004               | -.14 to .13 | .950            | .04                         | -.09 to .17  | .525            |
| <b>Accommodation</b>         | .11                                           | -.07 to .28 | .234        | .17                 | .01 to .34  | <b>.039</b>     | .21                         | .06 to .36   | <b>.007</b>     |

Table: Multivariate regression analyses with associations between PSF factors and MANSA domains<sup>1</sup>

| MANSA life domains           | PSF other areas |             |         |                      |              |         |
|------------------------------|-----------------|-------------|---------|----------------------|--------------|---------|
|                              | Communication   |             |         | Personal health care |              |         |
|                              | Coefficient     | 95% CI      | p-value | Coefficient          | 95% CI       | p-value |
| <b>Family</b>                | .10             | -.07 to .26 | .256    | .04                  | -.08 to .17  | .469    |
| <b>Friends</b>               | -.01            | -.14 to .13 | .927    | -.05                 | -.15 to .05  | .341    |
| <b>Employment/activities</b> | -.05            | -.22 to .12 | .567    | -.05                 | -.17 to .07  | .410    |
| <b>Leisure time</b>          | -.03            | -.19 to .14 | .766    | .04                  | -.08 to .16  | .512    |
| <b>Financial situation</b>   | -.02            | -.19 to .15 | .839    | .12                  | -.002 to .23 | .055    |
| <b>Personal safety</b>       | .02             | -.13 to .17 | .806    | .08                  | -.03 to .19  | .144    |
| <b>Physical health</b>       | .12             | -.05 to .28 | .166    | .11                  | -.01 to .22  | .079    |
| <b>Mental health</b>         | .12             | -.04 to .28 | .135    | .08                  | -.04 to .19  | .194    |
| <b>Living situation</b>      | .04             | -.12 to .20 | .634    | .05                  | -.07 to .16  | .416    |
| <b>Accommodation</b>         | .10             | -.10 to .30 | .316    | .04                  | -.10 to .18  | .572    |

<sup>1</sup> Adjusted for gender, age, substance abuse, level of psychiatric symptoms (BPRS positive symptoms, negative symptoms, agitation mania, anxiety/depressive symptoms), contact with social network
